# Supplementary material for: A journey through ternary lead chlorido tungstates by thermal scanning
Source: Royal Society of Chemistry journal article supplement (doi:10.1039/c7dt01098b), 2017-01-01

## checkCIF/PLATON report

Structure factors have been supplied for datablock(s) PbW6Cl2

THIS REPORT IS FOR GUIDANCE ONLY. IF USED AS PART OF A REVIEW PROCEDURE FOR PUBLICATION, IT SHOULD NOT REPLACE THE EXPERTISE OF AN EXPERIENCED CRYSTALLOGRAPHIC REFEREE.

No syntax errors found.      CIF dictionary      Interpreting this report

### Datablock: PbW6Cl2

---

Bond precision:    Pb-Cl = 0.0037 Å                      Wavelength=0.71073

Cell:                      a=7.5253(5)                      b=10.7498(7)                      c=12.5959(8)  
                              alpha=111.752(5)                      beta=98.044(5)                      gamma=96.224(5)  
Temperature:    293 K

|                | Calculated  | Reported    |
|----------------|-------------|-------------|
| Volume         | 922.75(11)  | 922.75(11)  |
| Space group    | P -1        | P -1        |
| Hall group     | -P 1        | -P 1        |
| Moiety formula | Cl14 Pb2 W3 | Cl14 Pb2 W3 |
| Sum formula    | Cl14 Pb2 W3 | Cl14 Pb2 W3 |
| Mr             | 1462.22     | 1462.23     |
| Dx,g cm-3      | 5.263       | 5.263       |
| Z              | 2           | 2           |
| Mu (mm-1)      | 38.817      | 38.817      |
| F000           | 1248.0      | 1248.0      |
| F000'          | 1236.01     |             |
| h,k,lmax       | 9,12,15     | 9,12,15     |
| Nref           | 3367        | 3164        |
| Tmin,Tmax      | 0.000,0.021 | 0.202,0.560 |
| Tmin'          | 0.000       |             |

Correction method= # Reported T Limits: Tmin=0.202 Tmax=0.560  
AbsCorr = NUMERICAL

Data completeness= 0.940                      Theta(max)= 25.350

R(reflections)= 0.0320( 2594)                      wR2(reflections)= 0.0638( 3164)

S = 1.043                      Npar= 173

---

The following ALERTS were generated. Each ALERT has the format

**test-name\_ALERT\_alert-type\_alert-level.**

Click on the hyperlinks for more details of the test.

---

**🔴 Alert level A**

PLAT029\_ALERT\_3\_A \_diffn\_measured\_fraction\_theta\_full value Low . 0.939 Note

---

**🟡 Alert level B**

PLAT911\_ALERT\_3\_B Missing # FCF Refl Between THmin & STh/L= 0.600 199 Report

---

**🟢 Alert level C**

PLAT906\_ALERT\_3\_C Large K value in the Analysis of Variance ..... 3.917 Check

PLAT971\_ALERT\_2\_C Check Calcd Residual Density 0.92A From Pb2 1.58 eA-3

---

**⚪ Alert level G**

PLAT004\_ALERT\_5\_G Polymeric Structure Found with Maximum Dimension 3 Info  
PLAT154\_ALERT\_1\_G The s.u.'s on the Cell Angles are Equal ..(Note) 0.005 Degree  
PLAT199\_ALERT\_1\_G Reported \_cell\_measurement\_temperature ..... (K) 293 Check  
PLAT200\_ALERT\_1\_G Reported \_diffn\_ambient\_temperature ..... (K) 293 Check  
PLAT232\_ALERT\_2\_G Hirshfeld Test Diff (M-X) Pb2 -- Cl7\_f .. 9.7 s.u.  
PLAT434\_ALERT\_2\_G Short Inter HL..HL Contact Cl1 .. Cl13 .. 3.38 Ang.  
PLAT434\_ALERT\_2\_G Short Inter HL..HL Contact Cl3 .. Cl3 .. 3.29 Ang.  
PLAT434\_ALERT\_2\_G Short Inter HL..HL Contact Cl8 .. Cl8 .. 3.24 Ang.  
PLAT794\_ALERT\_5\_G Tentative Bond Valency for Pb1 (II) ..... 2.32 Note  
PLAT794\_ALERT\_5\_G Tentative Bond Valency for Pb2 (II) ..... 2.34 Note  
PLAT910\_ALERT\_3\_G Missing # of FCF Reflection(s) Below Theta(Min) 3 Note  
PLAT912\_ALERT\_4\_G Missing # of FCF Reflections Above STh/L= 0.600 2 Note  
PLAT933\_ALERT\_2\_G Number of OMIT Records in Embedded .res File ... 2 Note

---

- 1 **ALERT level A** = Most likely a serious problem - resolve or explain  
1 **ALERT level B** = A potentially serious problem, consider carefully  
2 **ALERT level C** = Check. Ensure it is not caused by an omission or oversight  
13 **ALERT level G** = General information/check it is not something unexpected

- 3 ALERT type 1 CIF construction/syntax error, inconsistent or missing data  
6 ALERT type 2 Indicator that the structure model may be wrong or deficient  
4 ALERT type 3 Indicator that the structure quality may be low  
1 ALERT type 4 Improvement, methodology, query or suggestion  
3 ALERT type 5 Informative message, check
-

It is advisable to attempt to resolve as many as possible of the alerts in all categories. Often the minor alerts point to easily fixed oversights, errors and omissions in your CIF or refinement strategy, so attention to these fine details can be worthwhile. In order to resolve some of the more serious problems it may be necessary to carry out additional measurements or structure refinements. However, the purpose of your study may justify the reported deviations and the more serious of these should normally be commented upon in the discussion or experimental section of a paper or in the "special\_details" fields of the CIF. checkCIF was carefully designed to identify outliers and unusual parameters, but every test has its limitations and alerts that are not important in a particular case may appear. Conversely, the absence of alerts does not guarantee there are no aspects of the results needing attention. It is up to the individual to critically assess their own results and, if necessary, seek expert advice.

### **Publication of your CIF in IUCr journals**

A basic structural check has been run on your CIF. These basic checks will be run on all CIFs submitted for publication in IUCr journals (*Acta Crystallographica*, *Journal of Applied Crystallography*, *Journal of Synchrotron Radiation*); however, if you intend to submit to *Acta Crystallographica Section C* or *E* or *IUCrData*, you should make sure that full publication checks are run on the final version of your CIF prior to submission.

### **Publication of your CIF in other journals**

Please refer to the *Notes for Authors* of the relevant journal for any special instructions relating to CIF submission.

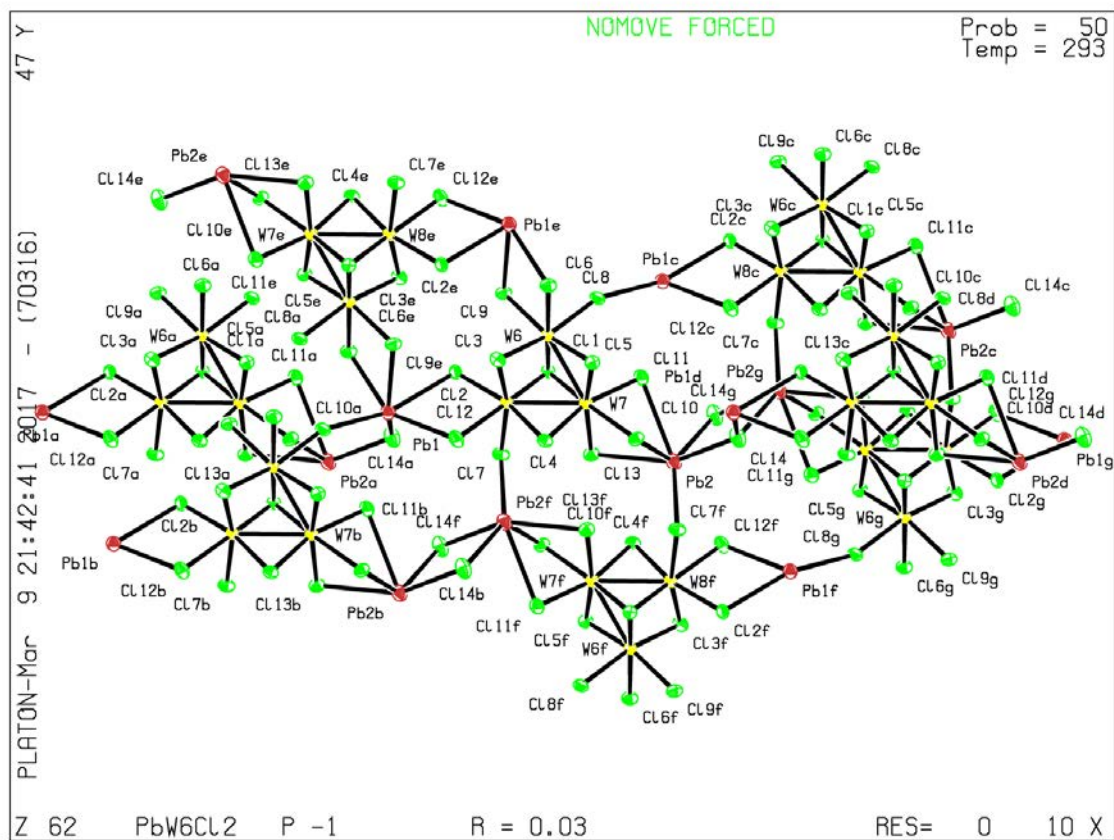

Supplement: c7dt01098b4.pdf [file c7dt01098b4.pdf]
