# Supplementary material for: A journey through ternary lead chlorido tungstates by thermal scanning
Source: Royal Society of Chemistry journal article supplement (doi:10.1039/c7dt01098b), 2017-01-01
Supplement: c7dt01098b3.pdf [file c7dt01098b3.pdf]

## checkCIF/PLATON report

Structure factors have been supplied for datablock(s) C\_\_shelx32\_PbWCl

THIS REPORT IS FOR GUIDANCE ONLY. IF USED AS PART OF A REVIEW PROCEDURE FOR PUBLICATION, IT SHOULD NOT REPLACE THE EXPERTISE OF AN EXPERIENCED CRYSTALLOGRAPHIC REFEREE.

No syntax errors found.      CIF dictionary      Interpreting this report

### Datablock: C\_\_shelx32\_PbWCl

---

|                 |                 |                    |             |
|-----------------|-----------------|--------------------|-------------|
| Bond precision: | W-Cl = 0.0054 A | Wavelength=0.71073 |             |
| Cell:           | a=13.4831(10)   | b=13.4831(10)      | c=9.8247(7) |
|                 | alpha=90        | beta=90            | gamma=90    |
| Temperature:    | 293 K           |                    |             |
|                 | Calculated      | Reported           |             |
| Volume          | 1786.1(3)       | 1786.1(3)          |             |
| Space group     | P 42/m          | P 42/m             |             |
| Hall group      | -P 4c           | -P 4c              |             |
| Moiety formula  | C126 Pb3 W6     | C126 Pb3 W6        |             |
| Sum formula     | C126 Pb3 W6     | C126 Pb3 W6        |             |
| Mr              | 2646.34         | 2646.37            |             |
| Dx,g cm-3       | 4.921           | 4.921              |             |
| Z               | 2               | 2                  |             |
| Mu (mm-1)       | 35.264          | 35.265             |             |
| F000            | 2264.0          | 2264.0             |             |
| F000'           | 2245.41         |                    |             |
| h,k,lmax        | 16,16,11        | 16,16,11           |             |
| Nref            | 1682            | 1680               |             |
| Tmin,Tmax       | 0.919,0.932     | 0.092,0.604        |             |
| Tmin'           | 0.004           |                    |             |

Correction method= # Reported T Limits: Tmin=0.092 Tmax=0.604  
AbsCorr = NUMERICAL

Data completeness= 0.999      Theta(max)= 25.022

R(reflections)= 0.0565( 1360)      wR2(reflections)= 0.0818( 1680)

S = 1.226      Npar= 87

---

The following ALERTS were generated. Each ALERT has the format

**test-name\_ALERT\_alert-type\_alert-level.**

Click on the hyperlinks for more details of the test.

---

**Alert level B**

PLAT973\_ALERT\_2\_B Check Calcd Positive Residual Density on Pb2 1.77 eA-3

---

**Alert level C**

PLAT790\_ALERT\_4\_C Centre of Gravity not Within Unit Cell: Resd. # 1 Note  
C126 Pb3 W6

PLAT906\_ALERT\_3\_C Large K value in the Analysis of Variance ..... 5.428 Check  
PLAT906\_ALERT\_3\_C Large K value in the Analysis of Variance ..... 2.216 Check

PLAT971\_ALERT\_2\_C Check Calcd Residual Density 1.09A From W1 2.09 eA-3  
PLAT971\_ALERT\_2\_C Check Calcd Residual Density 1.65A From C17 2.05 eA-3  
PLAT971\_ALERT\_2\_C Check Calcd Residual Density 1.96A From C13 1.94 eA-3  
PLAT971\_ALERT\_2\_C Check Calcd Residual Density 2.04A From C14 1.92 eA-3  
PLAT971\_ALERT\_2\_C Check Calcd Residual Density 1.92A From C17 1.69 eA-3  
PLAT971\_ALERT\_2\_C Check Calcd Residual Density 1.02A From Pb2 1.67 eA-3  
PLAT971\_ALERT\_2\_C Check Calcd Residual Density 1.91A From C18 1.60 eA-3  
PLAT971\_ALERT\_2\_C Check Calcd Residual Density 1.14A From W2 1.59 eA-3  
PLAT971\_ALERT\_2\_C Check Calcd Residual Density 2.40A From C11 1.54 eA-3  
PLAT971\_ALERT\_2\_C Check Calcd Residual Density 1.45A From W1 1.51 eA-3  
PLAT972\_ALERT\_2\_C Check Calcd Residual Density 1.77A From C12 -1.85 eA-3  
PLAT972\_ALERT\_2\_C Check Calcd Residual Density 1.74A From C18 -1.66 eA-3  
PLAT972\_ALERT\_2\_C Check Calcd Residual Density 1.58A From C17 -1.63 eA-3  
PLAT972\_ALERT\_2\_C Check Calcd Residual Density 0.65A From Pb2 -1.61 eA-3  
PLAT972\_ALERT\_2\_C Check Calcd Residual Density 1.77A From C14 -1.58 eA-3  
PLAT972\_ALERT\_2\_C Check Calcd Residual Density 2.24A From C17 -1.58 eA-3  
PLAT972\_ALERT\_2\_C Check Calcd Residual Density 1.45A From Pb2 -1.55 eA-3  
PLAT972\_ALERT\_2\_C Check Calcd Residual Density 1.45A From Pb2 -1.55 eA-3  
PLAT972\_ALERT\_2\_C Check Calcd Residual Density 1.50A From Pb2 -1.55 eA-3  
PLAT972\_ALERT\_2\_C Check Calcd Residual Density 2.25A From C13 -1.52 eA-3  
PLAT972\_ALERT\_2\_C Check Calcd Residual Density 1.86A From C17 -1.51 eA-3  
PLAT972\_ALERT\_2\_C Check Calcd Residual Density 1.59A From Pb2 -1.51 eA-3

---

**Alert level G**

PLAT004\_ALERT\_5\_G Polymeric Structure Found with Maximum Dimension 1 Info  
PLAT083\_ALERT\_2\_G SHELXL Second Parameter in WGHT Unusually Large 69.53 Why ?  
PLAT199\_ALERT\_1\_G Reported \_cell\_measurement\_temperature ..... (K) 293 Check  
PLAT200\_ALERT\_1\_G Reported \_diffrn\_ambient\_temperature ..... (K) 293 Check  
PLAT434\_ALERT\_2\_G Short Inter HL..HL Contact C12 .. C18 .. 3.31 Ang.  
PLAT434\_ALERT\_2\_G Short Inter HL..HL Contact C17 .. C17 .. 3.23 Ang.  
PLAT434\_ALERT\_2\_G Short Inter HL..HL Contact C17 .. C17 .. 3.23 Ang.  
PLAT794\_ALERT\_5\_G Tentative Bond Valency for Pb1 (II) ..... 2.44 Note  
PLAT794\_ALERT\_5\_G Tentative Bond Valency for Pb2 (II) ..... 2.12 Note  
PLAT909\_ALERT\_3\_G Percentage of Observed Data at Theta(Max) Still 76 % Note  
PLAT910\_ALERT\_3\_G Missing # of FCF Reflection(s) Below Theta(Min) 2 Note  
PLAT933\_ALERT\_2\_G Number of OMIT Records in Embedded .res File ... 1 Note

---

0 **ALERT level A** = Most likely a serious problem - resolve or explain

1 **ALERT level B** = A potentially serious problem, consider carefully

25 **ALERT level C** = Check. Ensure it is not caused by an omission or oversight

12 **ALERT level G** = General information/check it is not something unexpected

2 **ALERT type 1** CIF construction/syntax error, inconsistent or missing data

28 **ALERT type 2** Indicator that the structure model may be wrong or deficient

4 **ALERT type 3** Indicator that the structure quality may be low

1 **ALERT type 4** Improvement, methodology, query or suggestion

3 **ALERT type 5** Informative message, check

---

It is advisable to attempt to resolve as many as possible of the alerts in all categories. Often the minor alerts point to easily fixed oversights, errors and omissions in your CIF or refinement strategy, so attention to these fine details can be worthwhile. In order to resolve some of the more serious problems it may be necessary to carry out additional measurements or structure refinements. However, the purpose of your study may justify the reported deviations and the more serious of these should normally be commented upon in the discussion or experimental section of a paper or in the "special\_details" fields of the CIF. checkCIF was carefully designed to identify outliers and unusual parameters, but every test has its limitations and alerts that are not important in a particular case may appear. Conversely, the absence of alerts does not guarantee there are no aspects of the results needing attention. It is up to the individual to critically assess their own results and, if necessary, seek expert advice.

### **Publication of your CIF in IUCr journals**

A basic structural check has been run on your CIF. These basic checks will be run on all CIFs submitted for publication in IUCr journals (*Acta Crystallographica*, *Journal of Applied Crystallography*, *Journal of Synchrotron Radiation*); however, if you intend to submit to *Acta Crystallographica Section C* or *E* or *IUCrData*, you should make sure that full publication checks are run on the final version of your CIF prior to submission.

### **Publication of your CIF in other journals**

Please refer to the *Notes for Authors* of the relevant journal for any special instructions relating to CIF submission.

---

**PLATON version of 26/02/2017; check.def file version of 21/02/2017**
